# Supplementary material for: PAMAM Dendrimers as Potential Carriers of Gadolinium Complexes of Iminodiacetic Acid Derivatives for Magnetic Resonance Imaging
Source: Hindawi journal article supplement (doi:10.1155/2015/394827), 2015-01-01
Supplement: f1 [file 394827.f1.pdf]

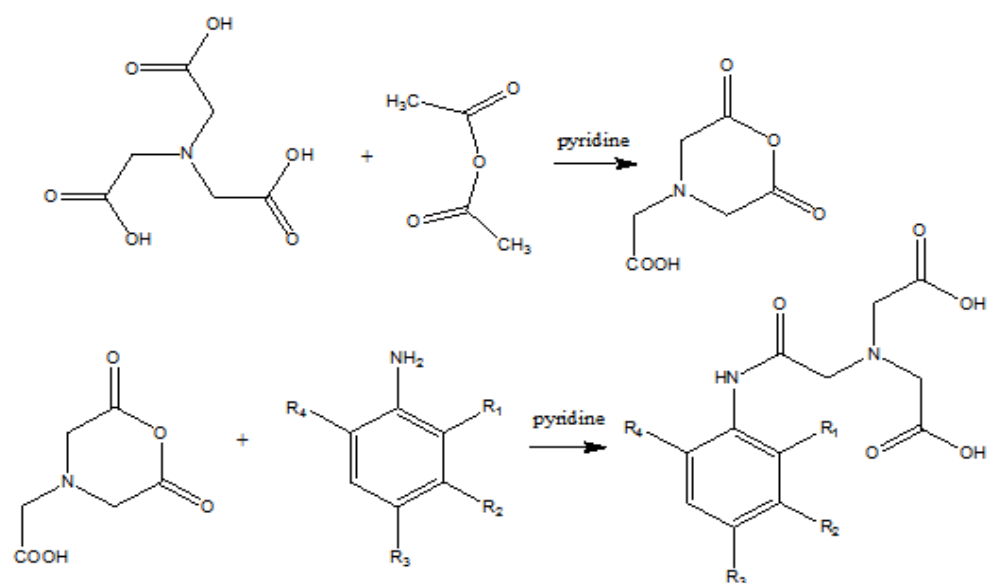

| Synthesized compound                                      | $R_1$           | $R_2$ | $R_3$           | $R_4$           |
|-----------------------------------------------------------|-----------------|-------|-----------------|-----------------|
| N-(4-methylacetanilide)iminodiacetic acid                 | H               | H     | CH <sub>3</sub> | H               |
| N-(2,4-dimethylacetanilide)iminodiacetic acid             | CH <sub>3</sub> | H     | CH <sub>3</sub> | H               |
| N-(2,4,6-trimethylacetanilide)iminodiacetic acid          | CH <sub>3</sub> | H     | CH <sub>3</sub> | CH <sub>3</sub> |
| N-(3-bromo-2,4,6-trimethylacetanilide)-iminodiacetic acid | CH <sub>3</sub> | Br    | CH <sub>3</sub> | CH <sub>3</sub> |

**Figure S1.** Synthesis of derivatives of *N*-(2-phenylamine-2-oxoethyl)iminodiacetic acid.

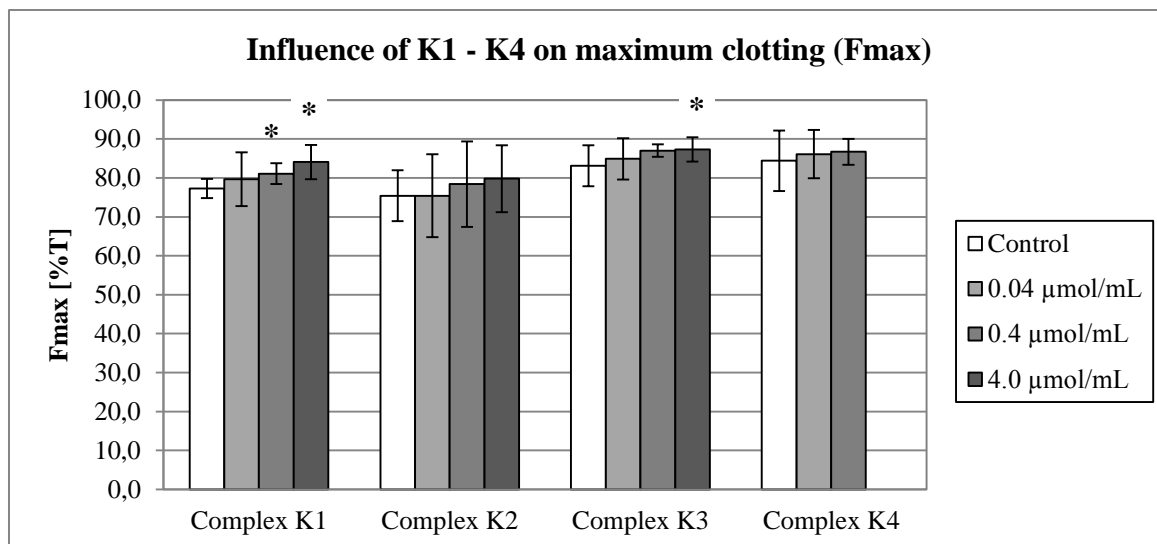

**Figure S2.** Influence of complexes K1 – K4 on maximum clotting (Fmax);  
 $* p < 0.05$ ;  $** p < 0.005$

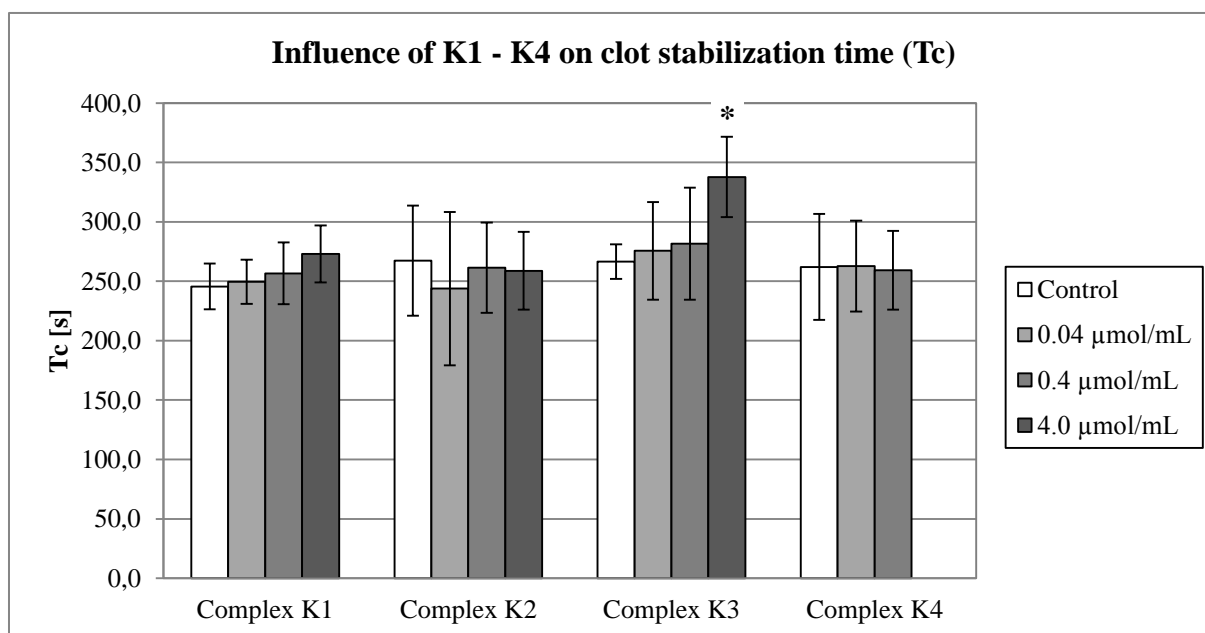

**Figure S3.** Influence of complexes K1 – K4 on clot stabilization time (Tc);  
 $* p < 0.05$

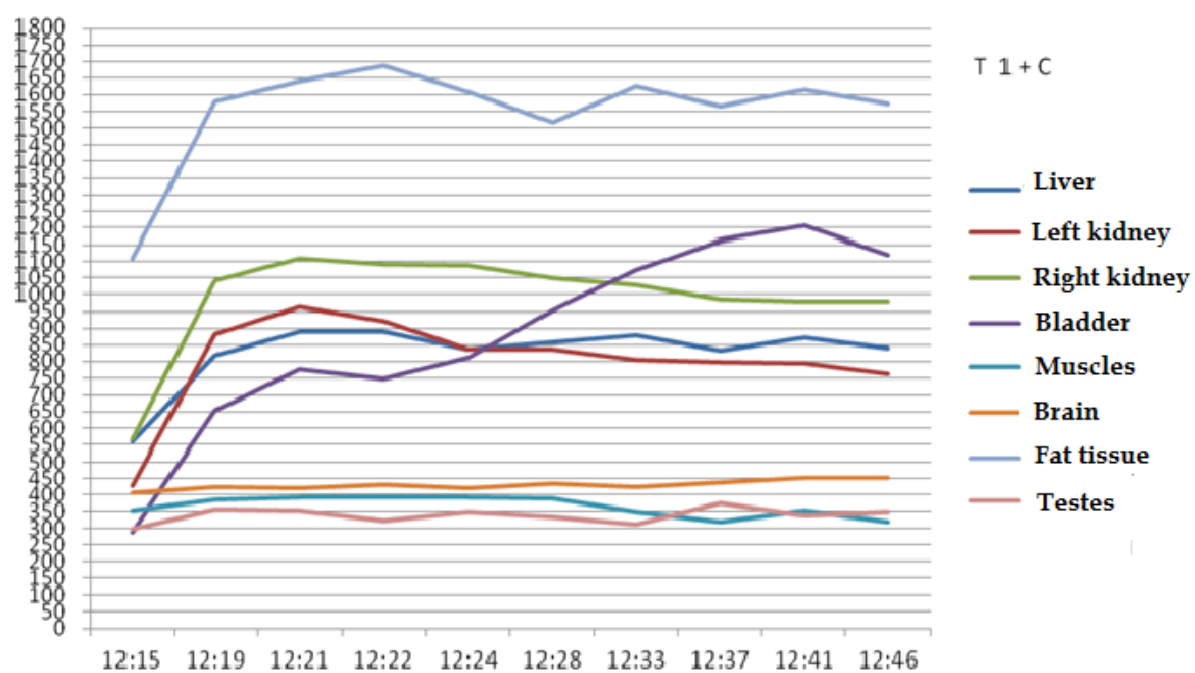

**Figure S4.** The changes of signal intensity in one representative rat.
